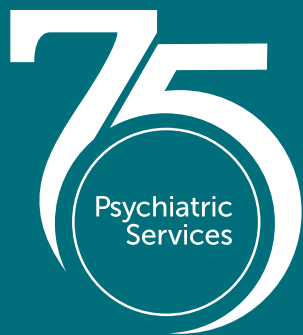

# Psychiatric Services

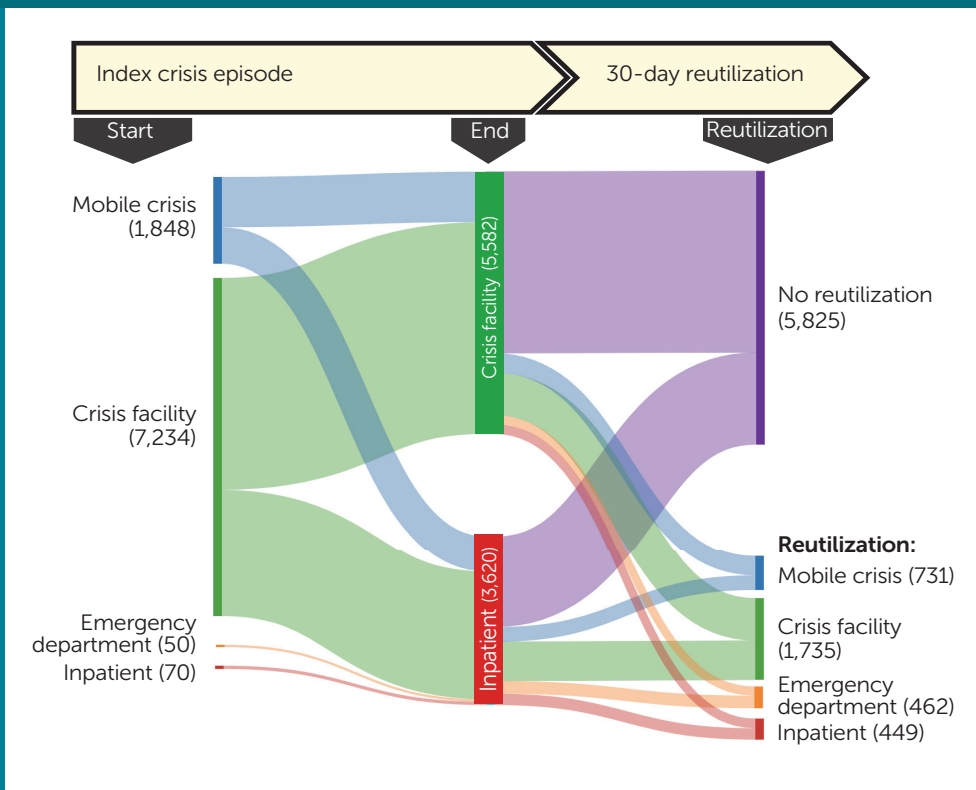

Patient flow and reutilization of crisis services within 30 days in a comprehensive crisis system

ADHD stimulant therapy and prescription drug misuse in transition to young adulthood

Addressing mental health disability in unsheltered homelessness

Lessons from other countries on alleviating the U.S. behavioral health workforce shortage
